# Supplementary material for: Landscape Enhancements in Apple Orchards: Higher Bumble Bee Queen Species Richness, but No Effect on Apple Quality
Source: MDPI journal article supplement (doi:10.3390/insects12050421), 2021-05-08
Supplement: s1 [file s1]

**Table S1.** List of pesticides used at the 12 orchards sampled in 2017 in Southern Québec, Canada. Information on the active ingredient(s), the usage and the bee toxicity were taken from SAgE pesticides web site [1]. When bee toxicity was unknown, the product was not included in the formula estimating the intensity of pesticide use on a given orchard (see Methods). The last column indicates if the pesticide was only used in orchard without landscape enhancement (Without), only in orchards with landscape enhancement (With) or in both (Both).

| Commercial Name       | Active Ingredient                      | Usage            | Bee Toxicity | Found in orchards |
|-----------------------|----------------------------------------|------------------|--------------|-------------------|
| Acramite <sup>2</sup> | Bifenazate                             | Insecticide      | Medium       | Without           |
| Agral <sup>2</sup>    | Nonylphenoxypolyethoxyethanol          | Adjuvant         | Not Known    | Without           |
| Agri-Mek <sup>2</sup> | Abamectine                             | Insecticide      | High         | Without           |
| Altacor*              | Chlorantraniliprole                    | Insecticide      | Low          | Both              |
|                       | Ammonium Sulfate <sup>2</sup>          | Fertilizer       | Low          | Without           |
| Apogee <sup>2</sup>   | Prohexadione-Calcium                   | Growth Regulator | Not Known    | Without           |
| Assail <sup>2</sup>   | Acetamiprid                            | Insecticide      | Medium       | With              |
| Beleaf <sup>1</sup>   | Flonicamid                             | Insecticide      | Low          | Both              |
|                       | Potassium Bicarbonate *                | Fongicide        | Low          | Both              |
|                       | Boron*                                 | Fertilizer       | Low          | Both              |
|                       |                                        | Fongicide And    |              | Both              |
|                       | Calcium Polysulfide*                   | Insecticide      | Low          |                   |
| Caltrac*              | Calcium                                | Fertilizer       | Low          | Both              |
| Calypso*              | Thiacloprid                            | Insecticide      | Low          | Both              |
| Captan*               | Captan                                 | Fongicide        | Low          | Both              |
| Clutch <sup>2</sup>   | Clothianidin                           | Insecticide      | High         | Without           |
|                       | Copper*                                | Fongicide        | Low          | Both              |
| Decis <sup>2</sup>    | Deltamethrin                           | Insecticide      | High         | Without           |
|                       | Bacillus thuringiensis subsp. kurstaki |                  |              | With              |
| Dipel <sup>1</sup>    | Strain ABTS-351                        | Insecticide      | Low          |                   |
| Entrust*              | Spinosad                               | Insecticide      | High         | Both              |
| Envidor <sup>2</sup>  | Spirodiclofen                          | Acaricide        | Low          | Without           |

|                               |                                     |                  |        |         |
|-------------------------------|-------------------------------------|------------------|--------|---------|
| Exirel <sup>1</sup>           | Cyantraniliprole                    | Insecticide      | High   | With    |
| Flint <sup>1</sup>            | Trifloxystrobin                     | Fungicide        | Low    | With    |
| Fontelis*                     | Penthiopyrad                        | Fungicide        | Low    | Both    |
| Fruitone*                     | 1-Naphthaleneacetic Acid            | Growth Regulator | Low    | Both    |
| Gf-120 Fruit Fly Bait*        | Spinosad                            | Insecticide      | High   | Both    |
| Glyphos <sup>1</sup>          | Glyphosate                          | Herbicide        | Low    | With    |
| Imidan*                       | Phosmet                             | Insecticide      | High   | Both    |
| Inspire Super <sup>1</sup>    | Cyprodinil / Difenoconazole         | Fungicide        | Low    | With    |
| Isomate <sup>1</sup>          | Pheromones                          | Attractive       | Low    | With    |
| Kumulus*                      | Sulfur                              | Fungicide        | Low    | Both    |
| Li-700*                       | Free Fatty Acids And IPA            | Adjuvant         | Low    | Both    |
| Mako <sup>2</sup>             | Cypermethrin                        | Insecticide      | High   | Without |
| Manganese <sup>1</sup>        | Manganese                           |                  | Low    | With    |
| Manzate*                      | Mancozeb                            | Fungicide        | Low    | Both    |
| Movento*                      | Spirotetramat                       | Insecticide      | Low    | Both    |
| Nealta <sup>2</sup>           | Cyflumetofen                        | Acaricide        | Low    | Without |
| Nova*                         | Myclobutanil                        | Fungicide        | Low    | Both    |
| Polyram*                      | Metiram                             | Fungicide        | Low    | Both    |
|                               | Potassium Bicarbonate *             | Fungicide        | Low    | Both    |
|                               | Thifensulfuron-Methyl / Tribenuron- |                  |        | Both    |
| Retain*                       | Methyl                              | Herbicide        | Medium |         |
| Ripcord <sup>1</sup>          | Cyperméthrin                        | Insecticide      | High   | With    |
| Roundup Transorb <sup>1</sup> | Glyphosate                          | Herbicide        | Low    | With    |
| Scala*                        | Pyrimethanil                        | Fungicide        | Low    | Both    |
| Sel D'epson*                  | Magnesium                           |                  | Low    | Both    |
| Sevin <sup>1</sup>            | Carbaryl                            | Insecticide      | High   | With    |
| Streptomycine*                | Streptomycin                        | Bactericide      | Low    | Both    |
| Superior 70 Oil*              | Mineral Oil                         | Insecticide      | Low    | Both    |
|                               | Urea*                               | Fertilizer       | Low    | Both    |

|                       |                               |             |           |         |
|-----------------------|-------------------------------|-------------|-----------|---------|
| Virosoft <sup>2</sup> | Codling Moth Granolosis Virus | Insecticide | Not Known | Without |
| Xiameter*             | Siloxylated Polyether         | Adjuvant    | Not Known | Both    |
|                       | Zinc <sup>2</sup>             | Fertilizer  | Low       | Without |

---

**Table S2.** Formulation of Bayesian hierarchical community occupancy model implemented in JAGS for the bumblebee queen data collected between 2017 and 2019 in southern Québec, Canada.

---

```

model{
##prior distribution of average occupancy over all species in the community
psi.mean ~ dunif(0, 1)
beta0 <- log(psi.mean) - log(1 - psi.mean)

##prior distribution of average detection over all species in the community
p.mean ~ dunif(0, 1)
alpha0 <- log(p.mean) - log(1 - p.mean)

##prior distribution of beta parameters for covariates on occupancy
mua1 ~ dnorm(0, 0.001) #hyperparameter defining mean of random slope of season
mua2 ~ dnorm(0, 0.001) #hyperparameter defining mean of random slope of
management
mua3 ~ dnorm(0, 0.001) #hyperparameter defining mean of random slope of intensity

##prior distribution of beta parameters for covariates on detection
nub1 ~ dnorm(0, 0.001) #hyperparameter defining mean of random slope of airtemp
nub2 ~ dnorm(0, 0.001) #hyperparameter defining mean of random slope of time of day

##prior distribution of SD of average occupancy
sigma.u ~ dunif(0, 50)

##prior distribution of SD of average detection
sigma.v ~ dunif(0, 50)

##precision (1/variance) of parameters
tau.u <- pow(sigma.u, -2)
tau.v <- pow(sigma.v, -2)

##variance of beta parameters on occupancy
sigma.a1 ~ dunif(0, 50) #hyperparameter defining variance of random slope of season
tau.a1 <- pow(sigma.a1, -2)
sigma.a2 ~ dunif(0, 50) #hyperparameter defining variance of random slope of
management
tau.a2 <- pow(sigma.a2, -2)
sigma.a3 ~ dunif(0, 50) #hyperparameter defining variance of random slope of intensity
tau.a3 <- pow(sigma.a3, -2)

##variance of beta parameters on detection

```

---

---

```

sigma.b1 ~ dunif(0, 50) #hyperparameter defining variance of random slope of airtemp
sigma.b2 ~ dunif(0, 50) #hyperparameter defining variance of random slope of time of
day
tau.b1 <- pow(sigma.b1, -2)
tau.b2 <- pow(sigma.b2, -2)

##random effect of site on psi
sigma.psi.site ~ dunif(0, 150)
tau.psi.site <- pow(sigma.psi.site, -2)
for (b in 1:nsiteID){
  alpha.site[b] ~ dnorm(0, tau.psi.site)
}
for (i in 1:nspecies) {

##Create priors for species i from the community level prior distributions
  ##parameters on occupancy
  phi0[i] ~ dnorm(beta0, tau.u) #intercept on occupancy
  a1[i] ~ dnorm(mua1, tau.a1) #beta for season
  a2[i] ~ dnorm(mua2, tau.a2) #beta for management
  a3[i] ~ dnorm(mua3, tau.a3) #beta for intensity (low = 0 vs high = 1)

  ##parameters on detectability
  eta0[i] ~ dnorm(alpha0, tau.v) #intercept on detection
  b1[i] ~ dnorm(nub1, tau.b1) #beta for airtemp
  b2[i] ~ dnorm(nub2, tau.b2) #beta for time of day

##Loop to estimate the Z matrix (true occurrence for species i at site j
  for (j in 1:nsite) {
    logit(psi[j, i]) <- phi0[i] + a1[i]*Season[j] + a2[i]*Management[j] + a3[i]*Intensity[j] +
alpha.site[SiteNum[i]]
    Z[j, i] ~ dbern(psi[j, i]) #prior distribution for latent variable of species i in site j
    ##Loop to estimate detection for species i at site j during sampling period k.
    for (k in 1:nvisit) {
      logit(p[j, k, i]) <- eta0[i] + b1[i]*Airtemp[j, k] + b2[i]*Time[j, k]
      ##if species not present (Z = 0), then p = 0 for species (species cannot be detected)
      mu.p[j,k,i] <- p[j, k, i]*Z[j, i]
      y[j,k,i] ~ dbern(mu.p[j, k, i])
    }
  }
}

##species richness at each site
for(j in 1:nsite){

```

---

---

```
sp.rich[j] <- sum(Z[j,]) # Number of species  
}
```

```
}
```

---

**Table S3.** Formulation of Bayesian hierarchical generalized linear mixed models for apple quality characteristics as a function of landscape enhancements and intensity of pesticide use implemented in JAGS for the apple data in 2017-2019 in southern Québec, Canada.

---

```
##linear mixed model for diameter, mass, and sugar level

##Apple condition for Gaussian response

model {
  for (i in 1:nsites){
    alpha.site[i] ~ dnorm(mu.site, tau.site)
  }

  ##hyperparameters for random intercepts
  mu.site ~ dnorm(0, 0.001)
  sigma.site ~ dunif(0, 100)
  tau.site <- 1 / (sigma.site * sigma.site)

  ##fixed effects
  beta.managed ~ dnorm(0, 0.001) #managed = 0, 1
  beta.intensity ~ dnorm(0, 0.001) #intensity <= 48.5 (0), > 48.5 (1)

  ##residual variance
  sigma ~ dunif(0, 100)
  tau <- 1/(sigma * sigma)

  ##likelihood
  for (i in 1:n) {
    Mass[i] ~ dnorm(mu[i], tau)
    mu[i] <- alpha.site[Site.num[i]] + beta.managed * Managed[i] + beta.intensity *
    Intensity[i]
  }

  ##generalized linear mixed model for total number of seeds
  ##Apple condition for Poisson response
  model {
    for (i in 1:nsites){
      alpha.site[i] ~ dnorm(mu.site, tau.site)
```

---

---

```
}

##hyperparameters for random intercepts
mu.site ~ dnorm(0, 0.001)
sigma.site ~ dunif(0, 100)
tau.site <- 1 / (sigma.site * sigma.site)

##fixed effects
beta.managed ~ dnorm(0, 0.001) #managed = 0, 1
beta.intensity ~ dnorm(0, 0.001) #intensity <= 48.5 (0), > 48.5 (1)

##likelihood
for (i in 1:n) {
  Seed[i] ~ dpois(lambda[i])
  log(lambda[i]) <- alpha.site[Site.num[i]] + beta.managed * Managed[i] +
beta.intensity * Intensity[i]
}

}
```

---

## References

1. SAgE Pesticides Traitements phytosanitaires et risques associés Available online:  
<https://www.sagepesticides.qc.ca/Recherche/RechercheTraitement>.
